# Supplementary material
Source: PubMed Central journal article supplement (PMC4205183)
Supplement: NIHMS611522-supplement-Supp_FigureS1-S5.pdf [file NIHMS611522-supplement-Supp_FigureS1-S5.pdf]

A.

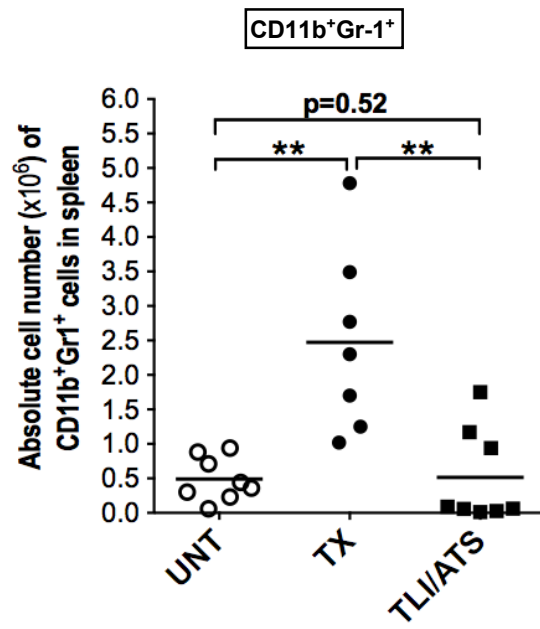

B.

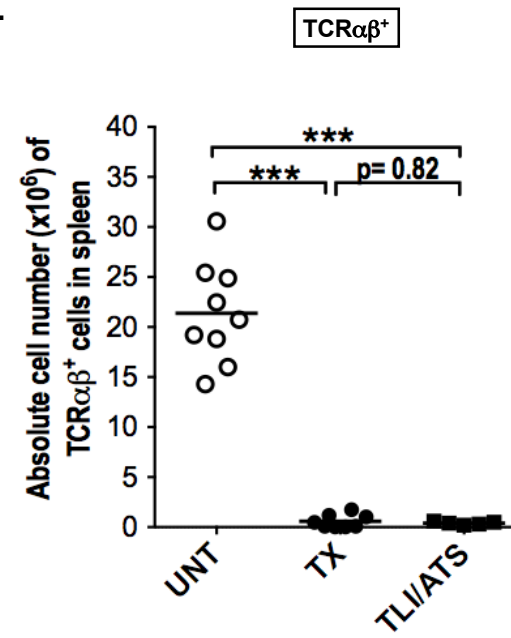

C.

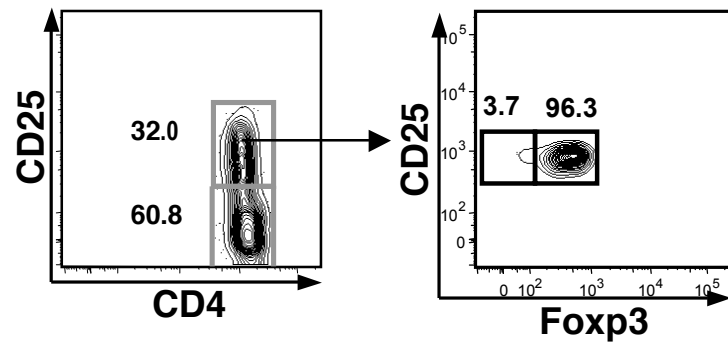

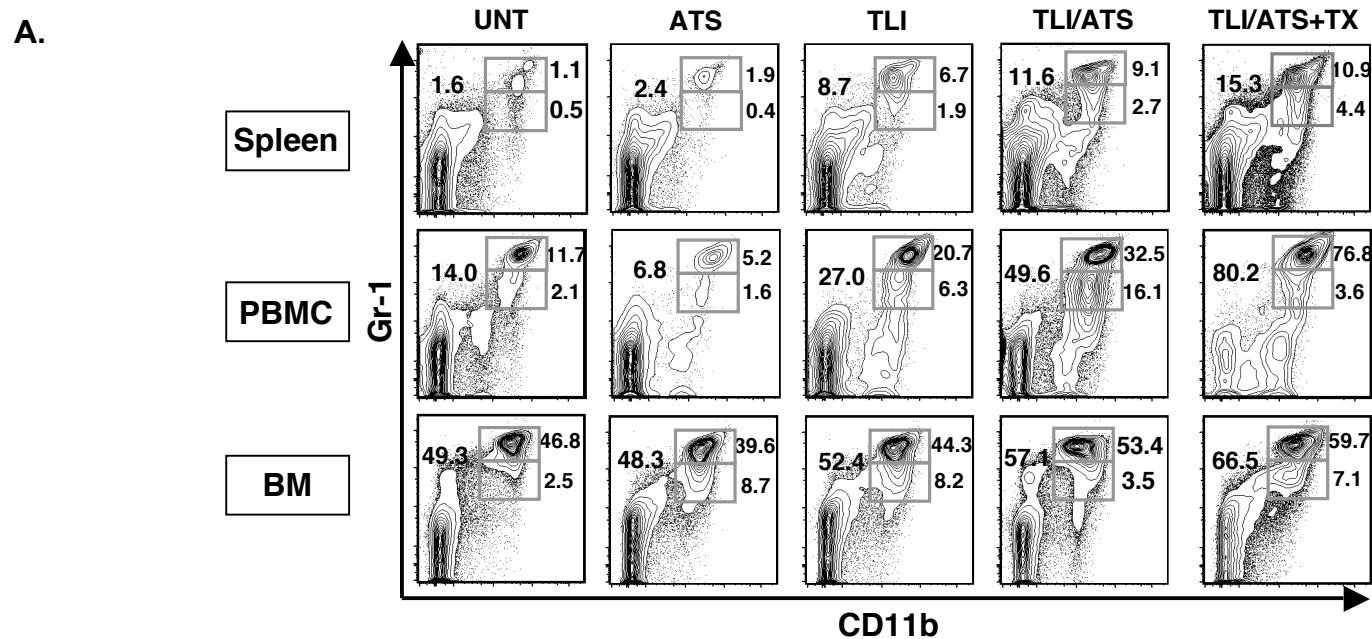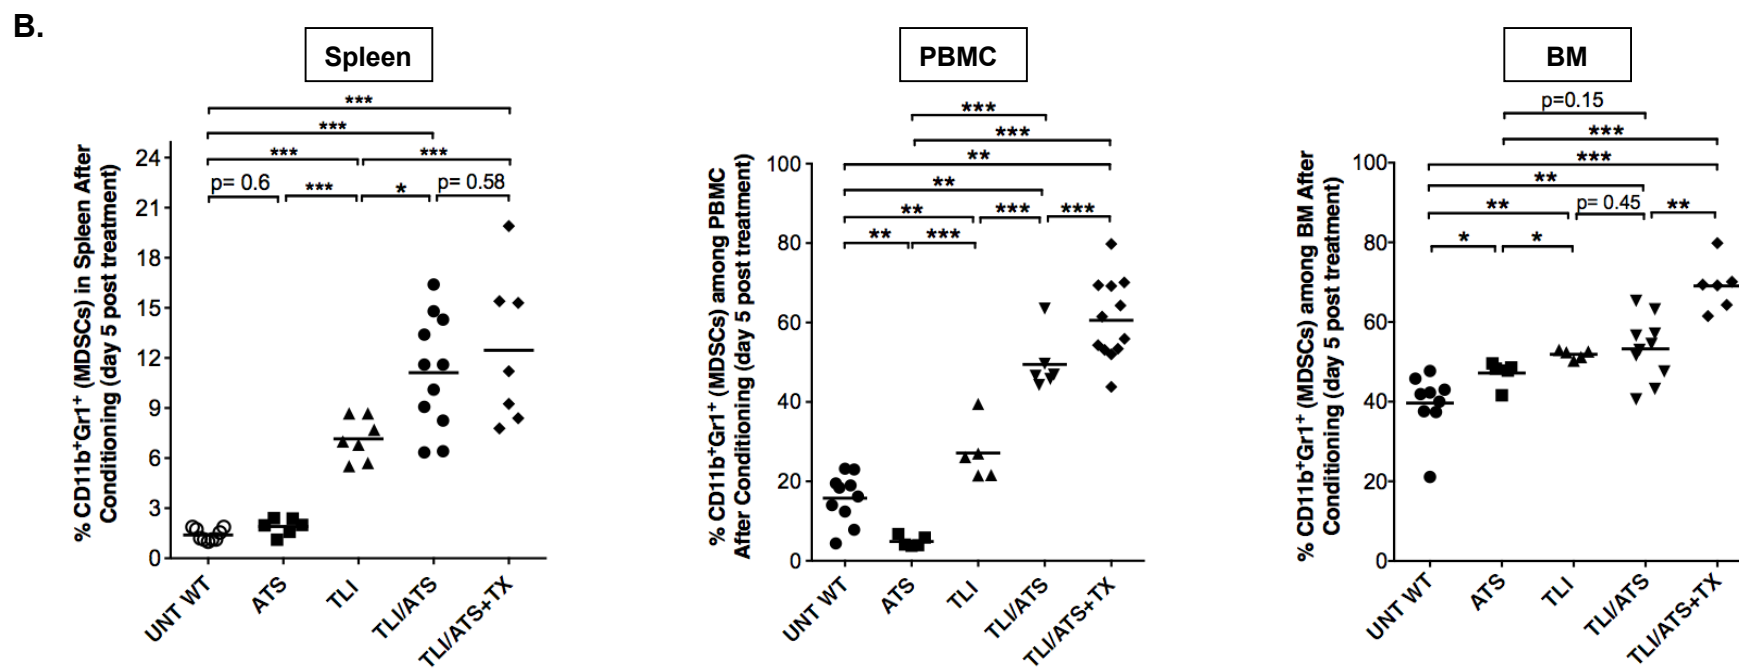

**Supplementary Figure 2**

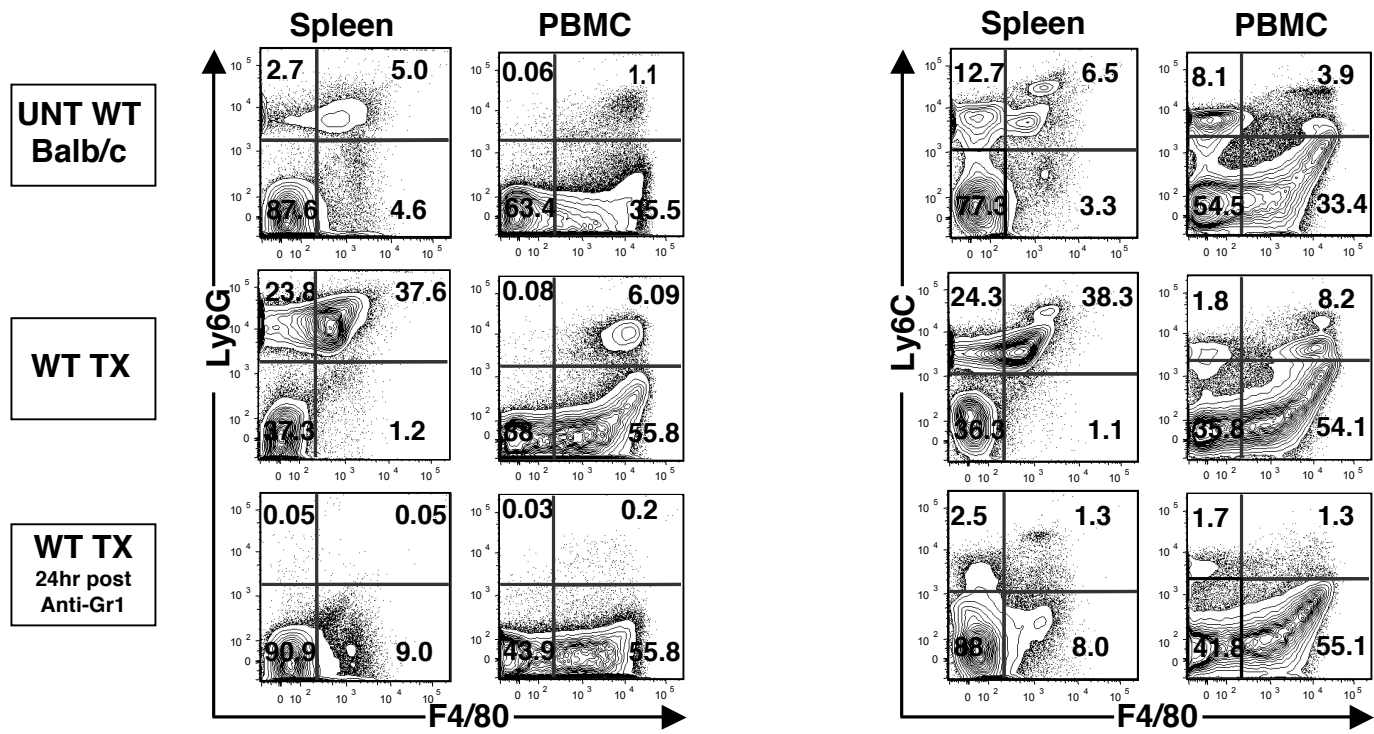

Supplementary Figure 3

A.

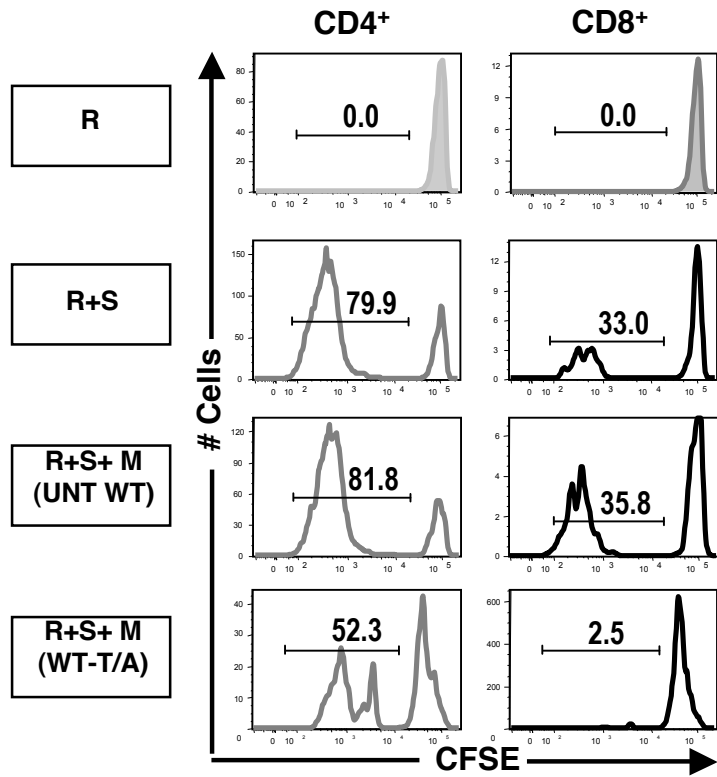

B.

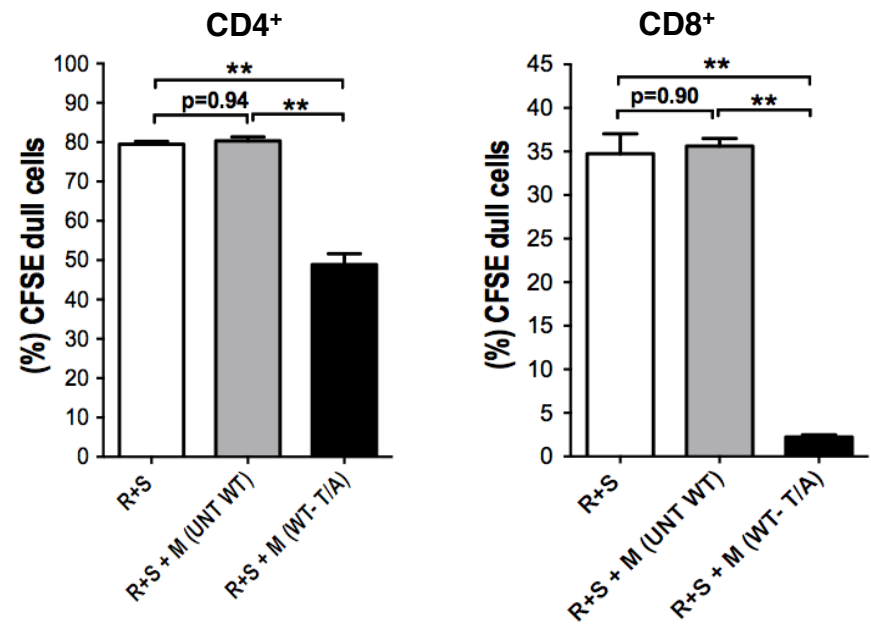

C.

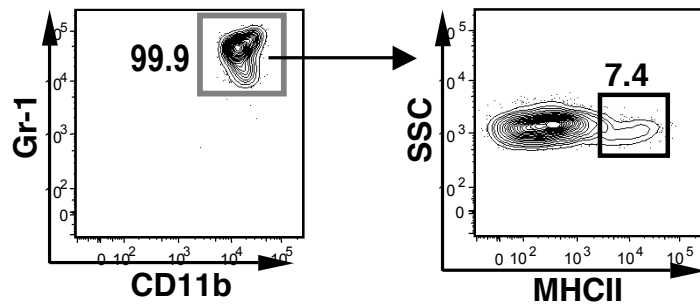

Supplementary Figure 4

A.

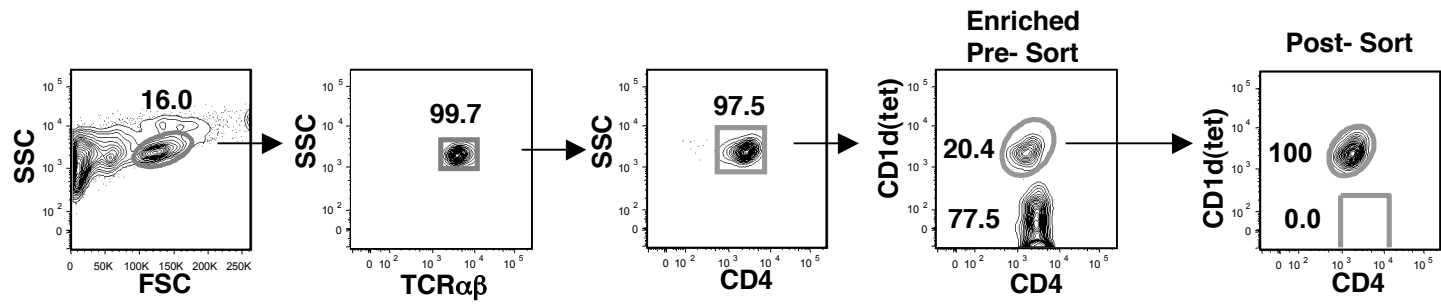

B.

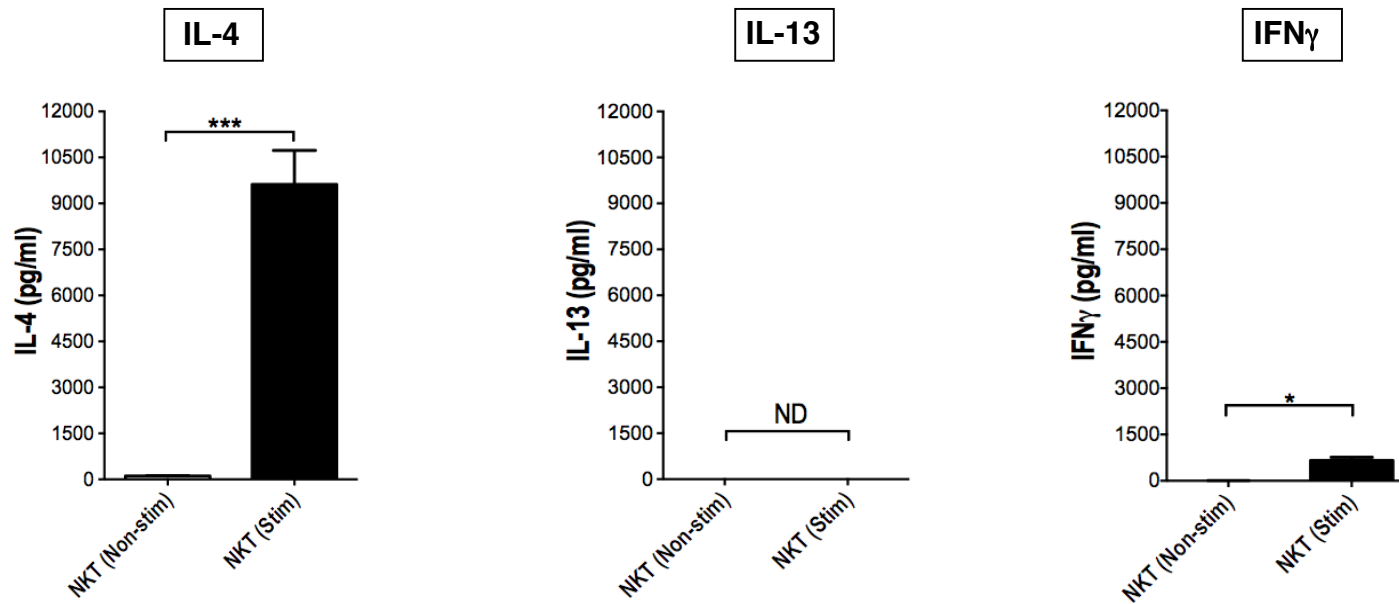

Supplementary Figure 5

**A.**

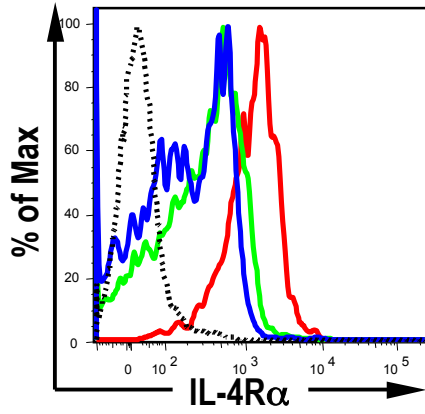

**B.**

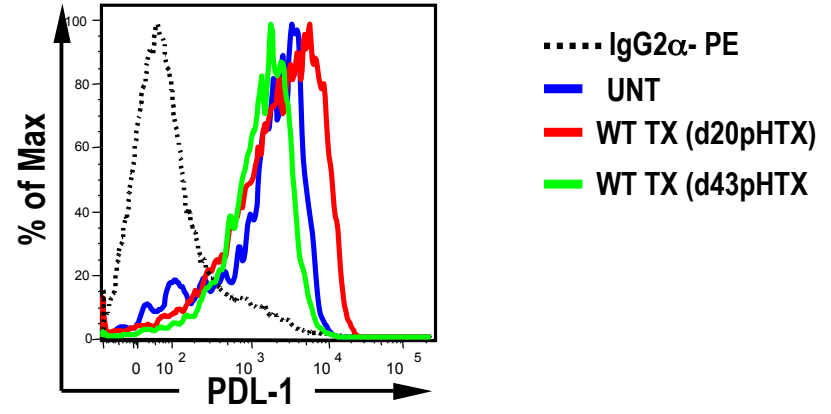

**C.**

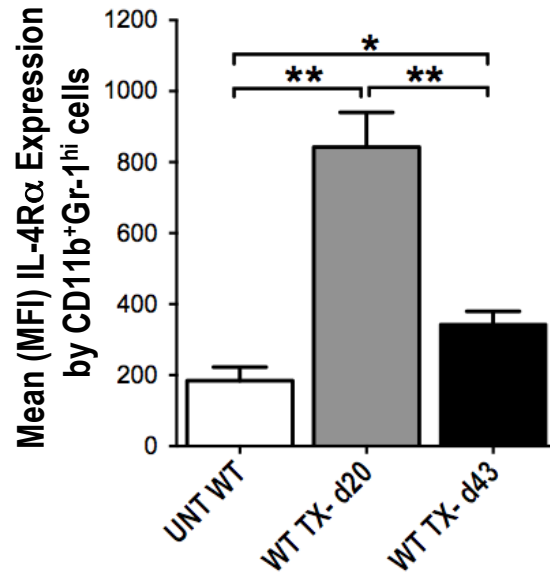

**D.**

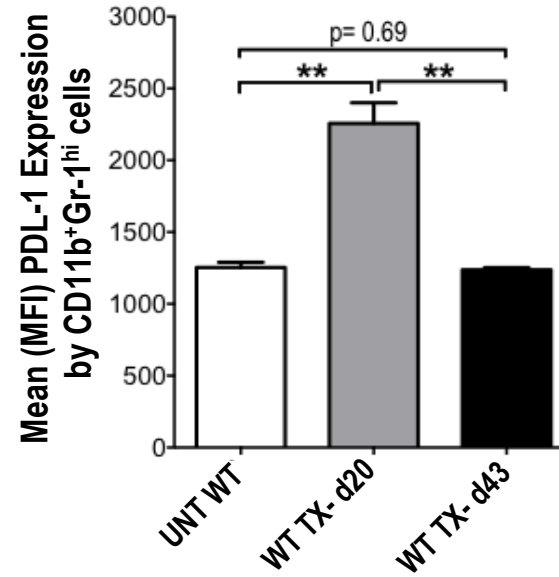

**Supplementary Figure 6**
